# Supplementary material
Source: publisher figshare collection journal article supplement (https://aacr.figshare.com/ndownloader/files/39908402)
Supplement: Supplementary file 1 [file 39908402]

Supplementary Figures Legends

**Supplementary Fig. 1.** Network geometry of the connected network of studies that evaluated pathological complete response. The circles represent the regimen as a node in the network. The lines represent direct comparisons between studies. The line thickness represents the number of studies that were included in each comparison. (A) Radical cystectomy alone. (B) Methotrexate/vinblastine/Adriamycin®/cisplatin regimen. (C) Cisplatin/methotrexate regimen. (D) Cisplatin/methotrexate/vinblastine regimen. (E) Gemcitabine/cisplatin regimen.

Supplementary Fig. 2. Funnel plots of the publication bias tests. Each point represents a separate study for the indicated association. The vertical line represents the mean effect size. (A) Radical cystectomy alone versus the methotrexate/vinblastine/Adriamycin®/cisplatin regimen (MVAC) of neo-adjuvant chemotherapy (NACH). (B) Radical cystectomy alone versus gemcitabine/cisplatin (GC) NACH. (C) Methotrexate/vinblastine/Adriamycin®/cisplatin MVAC NACH versus GC NACH.

Supplementary Fig. 3. Probability bar plots (rankograms) for the neo-adjuvant chemotherapy network. The regimens were ranked according to the surface under the cumulative ranking curve (SUCRA) values. The possible rank of each treatment (from best to worse according to the outcome) is shown on the horizontal axis. The size of each bar corresponds to the probability of each treatment to be at a specific rank.
